# Supplementary material for: Therapeutic plasma exchange in severe postpartum HELLP syndrome: a promising treatment
Source: BMC Pregnancy Childbirth. 2025 Dec 18;26:104. doi: 10.1186/s12884-025-08585-x (PMC12853623; doi:10.1186/s12884-025-08585-x)
Supplement: Supplementary file 1 — Supplementary Material 1. [file 12884_2025_8585_MOESM1_ESM.xlsx]

## Sheet: Sayfa1
		ilk geliş																						taburculuk
isim/soayd	yaş	hemoglobin	retikülosit	trombosit	aptt	pz	AST	ALT	T.bilirubin	LDH	fibrinojen	d-dimer	kreatinin	plzamferez seans	ASFA	TDP :0, albümin:1, lklsi :2	diğer tedaviler (prednol:0, IVIG :1)	gebelik hafta	plazmaferez endikasyon : HELLP:0, TTP/HÜS :1, guillan barre :2,diğer :3)	YD tartı	boy	Apgar1.dk	Apgar 5. dk	hemoglobin	retikülosit	trombosit	aptt	pz	AST	ALT	T.bilirubin	LDH	fibrinojen	d-dimer	kreatinin	son durum : EX:o, yaşıyor:1)	gebelik haftası	yendidoğan yatış yok:0,var:1	doğum şekli nsd:1, cs:2	magnezyum yok :0,var:1	gravide	parite	abort	önceki gebeliklerde hellp:1,preeklampsi:2 yok:0	hasta servis takibi: 0 yoğun bakım takibi:1
ASYA KAÇAK	41	5		29	73	138	112	70	1.6	1747	256	3.8	3	2			0	32	HELLP					11		173	20	70	27	30	0.2	278	368	1.2	2.1	1	32		2	1	4	3	YOK	0	1
AYSEL YILDIZ	29	7		9	37	26	235	83	1.7	850	385	12	0.4	1		0	1	13	TTP					6.6		280	21	13	44	67	1.5	1876	342	10.8	0.4	1	13		1	0	2	2	YOK	0	1
BAHAR TUTĞAÇ	23	6		92	31	14	310	196	1.9	4130	25	673	0.66	2			1	8	TTP					11		166	20	20	66	52	1	3200	340	10	0.6	1	8		1	0	2	1	YOK	0	1
DEMET DENİZ	28	11		81	27	15	13	12	2	1280	32	1.5	0.4	1			0	14	TTP					10		312	13	11	14	10	0.37	300	425	1.5	0.5	1	14		1	1	1	0	YOK	0	1
DİLEK FİDAN	28	10.6		34	36	17	1103	389	8.3	4026	151	>30	1.2	3			1	20	HELLP					9.4		130	24	13	28	6	1.2	312	337	12	0.4	1	20		1	0	3	2	YOK	0	1
DUYGU DAMARSEÇKİN	35	5		12	42	21	712	412	6	3125	101	>30	1.3	2			0	28	HELLP					8.3		210	17	12	35	27	1.1	237	205	10.2	0.9	1	28		1	0	5	3	1	0	0
ELİF DEMİR	33	9		6	75	37	512	345	8	2136	76	25	2.2	1			0	38	HELLP					10		215	13	7	40	34	2	136	198	2.8	1.1	1	38		2	1	4	3	YOK	0	0
ESMA GÜLEŞÇE	35	6		4	17	75	400	412	6	439	56	34	1.2	1			0	7						11		217	17	21	40	30	1.5	150	256	3.8	3	1	7		1	1	1	1	YOK	0	1
ESMA TAYANCAN	27	6		56	38	34	256	347	1.5	1954	128	32	1.5	3			0	28						13		223	22	34	28	29	0.3	137	385	12	0.4	1	28		2	1	3	3	YOK	0	1
FATMA CAN	30	9		70	43	45	345	456	1.7	2430	216	36	2.3	2			0	39						9.3		227	21	35	29	45	1.2	276	25	673	0.66	1	39		2	1	5	4	1	0	1
FATMA KAMER	36	11		34	23	22	365	345	2.1	1749	265	43	2.4	2			1	32						9.4		239	17	33	34	19	0.37	245	32	1.5	0.4	1	32		2	0	4	4	YOK	0	1
FATMA SAKALLI DEMİR	28	5.9		32	27	54	453	245	3.4	1654	312	32	2.1	1			0	22						8.3		318	18	31	38	23	1.4	134	151	>30	1.2	1	22		1	0	2	1	1	0	1
GÜL DİLER	47	7.3		37	25	34	256	118	1.7	2130	183	12	1.4	3			0	14						8		217	19	43	32	26	1.2	139	101	>30	1.3	1	14		1	0	2	2	YOK	0	1
GÜLSÜM PEYAN	30	6		63	36	65	243	543	1.8	1324	213	34	1.6	2		0	1	12						9		218	18	58	64	39	1.5	264	76	25	2.2	1	12		1	0	1	1	YOK	0	1
HİCRAN ASLAN	37	6.8		34	41	43	265	678	1.4	1543	342	32	1.2	3			1	6						7.5		276	17	39	63	30	1.4	276	56	34	1.2	1	6		1	0	1	1	YOK	0	1
HİCRAN ÇİÇEK ARAT	35	10.2		12	50	76	345	543	2.4	2431	324	35	0.5	1			1	9						6.6		254	15	63	40	30	0.4	365	128	32	1.5	1	9		1	1	3	3	YOK	0	1
HÜLYA AÇIK	33	5.3		19	54	45	900	278	3.1	3123	318	32	0.3	1		0	1	13						6.9		216	20	54	32	60	1.3	217	216	36	2.3	1	13		1	0	5	4	1	0	1
HÜLYA GENÇ	37	5.7		7	32	56	768	342	1.4	1712	261	35	1.3	2			1	34	HELLP					9		274	21	72	37	55	1.2	384	265	43	2.4	1	34		2	1	4	4	YOK	0	1
MÜRŞİDE KARDAŞ	30	6.8		13	28	35	567	289	2.2	1723	184	25	1.3	3			0	32	HELLP					8		232	22	54	36	53	1.5	374	312	32	2.1	1	32		2	0	2	2	YOK	0	1
NURTEN KIYGA	23	8.9		24	41	36	605	324	1.5	1521	325	21	1.5	1			1	30	HELLP - COVİT					11		264	17	52	31	37	2	328	183	12	1.4	1	30		2	0	2	2	YOK	0	1
RUKİYE TANIŞ	36	6		9	37	23	347	389	1.8	2723	241	25	1.6	2		0	0	19						13		317	18	51	35	38	2	287	213	34	1.6	1	19		1	0	1	1	YOK	0	1
SAKİNE DEMİRCAN	40	7.4		55	48	67	287	423	2.7	2391	243	27	0.3	1			0	28 (İKİZ GEBE)						9.5		137	15	29	32	19	1.2	216	342	32	1.2	1	28 (İKİZ GEBE)		2	0	1	1	YOK	0	1
SELVİHAN BAYİR	41	5.4		13	43	66	356	267	2.6	2332	215	32	0.6	1			0	27						8.5		140	16	17	28	20	1.2	267	324	35	0.5	1	27		2	0	3	3	YOK	0	1
SEVGÜL KIRMIZI	49	5.7		30	37	26	567	456	3.2	2692	328	34	1.7	2			0	34	PREEKLAMPSİ					8.4		219	18	37	50	30	1.3	265	318	32	0.3	1	34		2	0	5	5	YOK	0	1
SİTTİ BOZDEMİR	33	6.3		41	28	74	653	673	1.7	1482	319	38	1.2	1			1	20						8.3		276	20	36	43	30	1.4	324	261	35	1.3	1	20		2	1	1	1	YOK	0	1
ŞENGÜL ÇAKIR	42	12		14	34	77	754	421	1.5	1643	274	12	1.5	2			0	13						9		259	21	38	28	52	0.2	1453	184	25	1.3	1	13		1	1	1	1	YOK	0	1
YASEMİN KARADOĞAN	25	9		57	23	54	547	286	2.4	2364	185	29	1.4	3			1	27						8		154	23	42	45	55	1.2	487	325	21	1.5	1	27		2	1	3	3	YOK	0	1
ZEYNEP BERTAN	23	9.2		79	32	18	67	294	2.1	1732	269	27	1.6	1			0	36	HELLP					7.9		265	22	49	50	60	0.3	567	241	25	1.6	1	36		2	1	4	4	YOK	0	1
ZEYNEP ŞEN	30	8.8		27	27	22	374	267	3.2	1329	153	35	1.5	2		0	0	20						11		276	21	29	40	31	1.2	398	243	27	0.3	1	20		1	0	2	2	YOK	0	1
ZİNNET BAYÖZEN	38	5.8		15	42	45	276	512	1.5	1578	381	38	1.3	1			0	26	PREEKLAMPSİ					7.8		214	19	31	32	34	2	492	215	32	0.6	1	26		2	0	2	2	YOK	0	1
ZÜLAL GÜVEN	37	9.2		8	52	32	564	391	1.7	2381	271	31	1.6	3			0	38						7.9		219	18	38	37	27	1.5	578	328	34	1.7	1	38		2	1	1	1	YOK	0	1
KÜBRA SALİM	23	7		29	24	58	806	271	1.4	1734	396	38	0.5	1		0	1	29	HELLP					9		236	17	36	31	30	1.3	1438	319	38	1.2	1	29		2	1	1	1	YOK	0	1
JIYAN AKDOĞAN	30	8..6		34	22	81	78	98	1, 1	2322	103	25	0.9	2		0	0	37	TTP					11		186	25	45	25	25	1.1	1321	193	0.85	0.54	1	37		2	1	3	2	YOK	0	1
YONCA ALKAN	33	7, 6		94	32	39	89	86	1	283	92	36	1, 1	3		0	1	22	PREEKLAMPSİ					10.6		136	28	43	13	48	0.9	748	224	12	0.8	1	22		1	1	2	1	YOK	0	1
İKBAL ALTUN	44	8..6		103	30	21	98	89	1	312	190	20	0, 9	2		1	0	21	HELLP					11		232	16	18	16	21	1, 1	298	312	10	1, 1	0	21		2	1	4	3	YOK	0	1
MEDİNE ALGÜL	25	7		141	23	15	34	12	1, 2	234	210	10	1.3	3		0	1	23	GLOMERÜLO NEFRİT PREEKLAMPSİ					11, 4		141	29	116	17	32	1	438	507	8	3, 75	1	23		2	1	1	0	1	2	1
SAİME TEKER	31	8		54	13	12	182	167	2	1234	98	12	1, 8	3		1	1	31	PREEKLAMPSİ					11		123	20	133	12	24	1.5	298	231	13	1	1	36	1	2	1	3	2	0	0	1
DEVLET BİLENER	29	6		98	10	24	134	123	1	234	123	10	0, 6	2		0	0	33	PREEKLAMPSİ					13		235	12	98	39	54	1	678	124	10	0, 5	0	33	1	1	1	7	2	4	0	1
SAİME TEKER	31	10		32	20	50	176	190	1	3000	90	5	1, 8	1		0	0	36	PREEKLAMPSİ					12		190	21	132	40	43	1	300	234	3	0.7	1	36	1	2	1	4	3	0	2	1
